# Supplementary material
Source: HighWire-hosted journal article supplement (http://www.cmaj.ca/highwire/filestream/59168/field_highwire_adjunct_files/3/birth-urquia-4-at.pdf)
Supplement: birth-urquia-4-at.pdf [file birth-urquia-4-at.pdf]

Appendix 4 (as supplied by the authors): Risk of adverse neonatal outcomes according to whether infants were classified as small for gestational age (SGA) (< 10th percentile) by the Canadian birth-weight curve or by world region-specific birth-weight curves, or both, relative to non-SGA infants

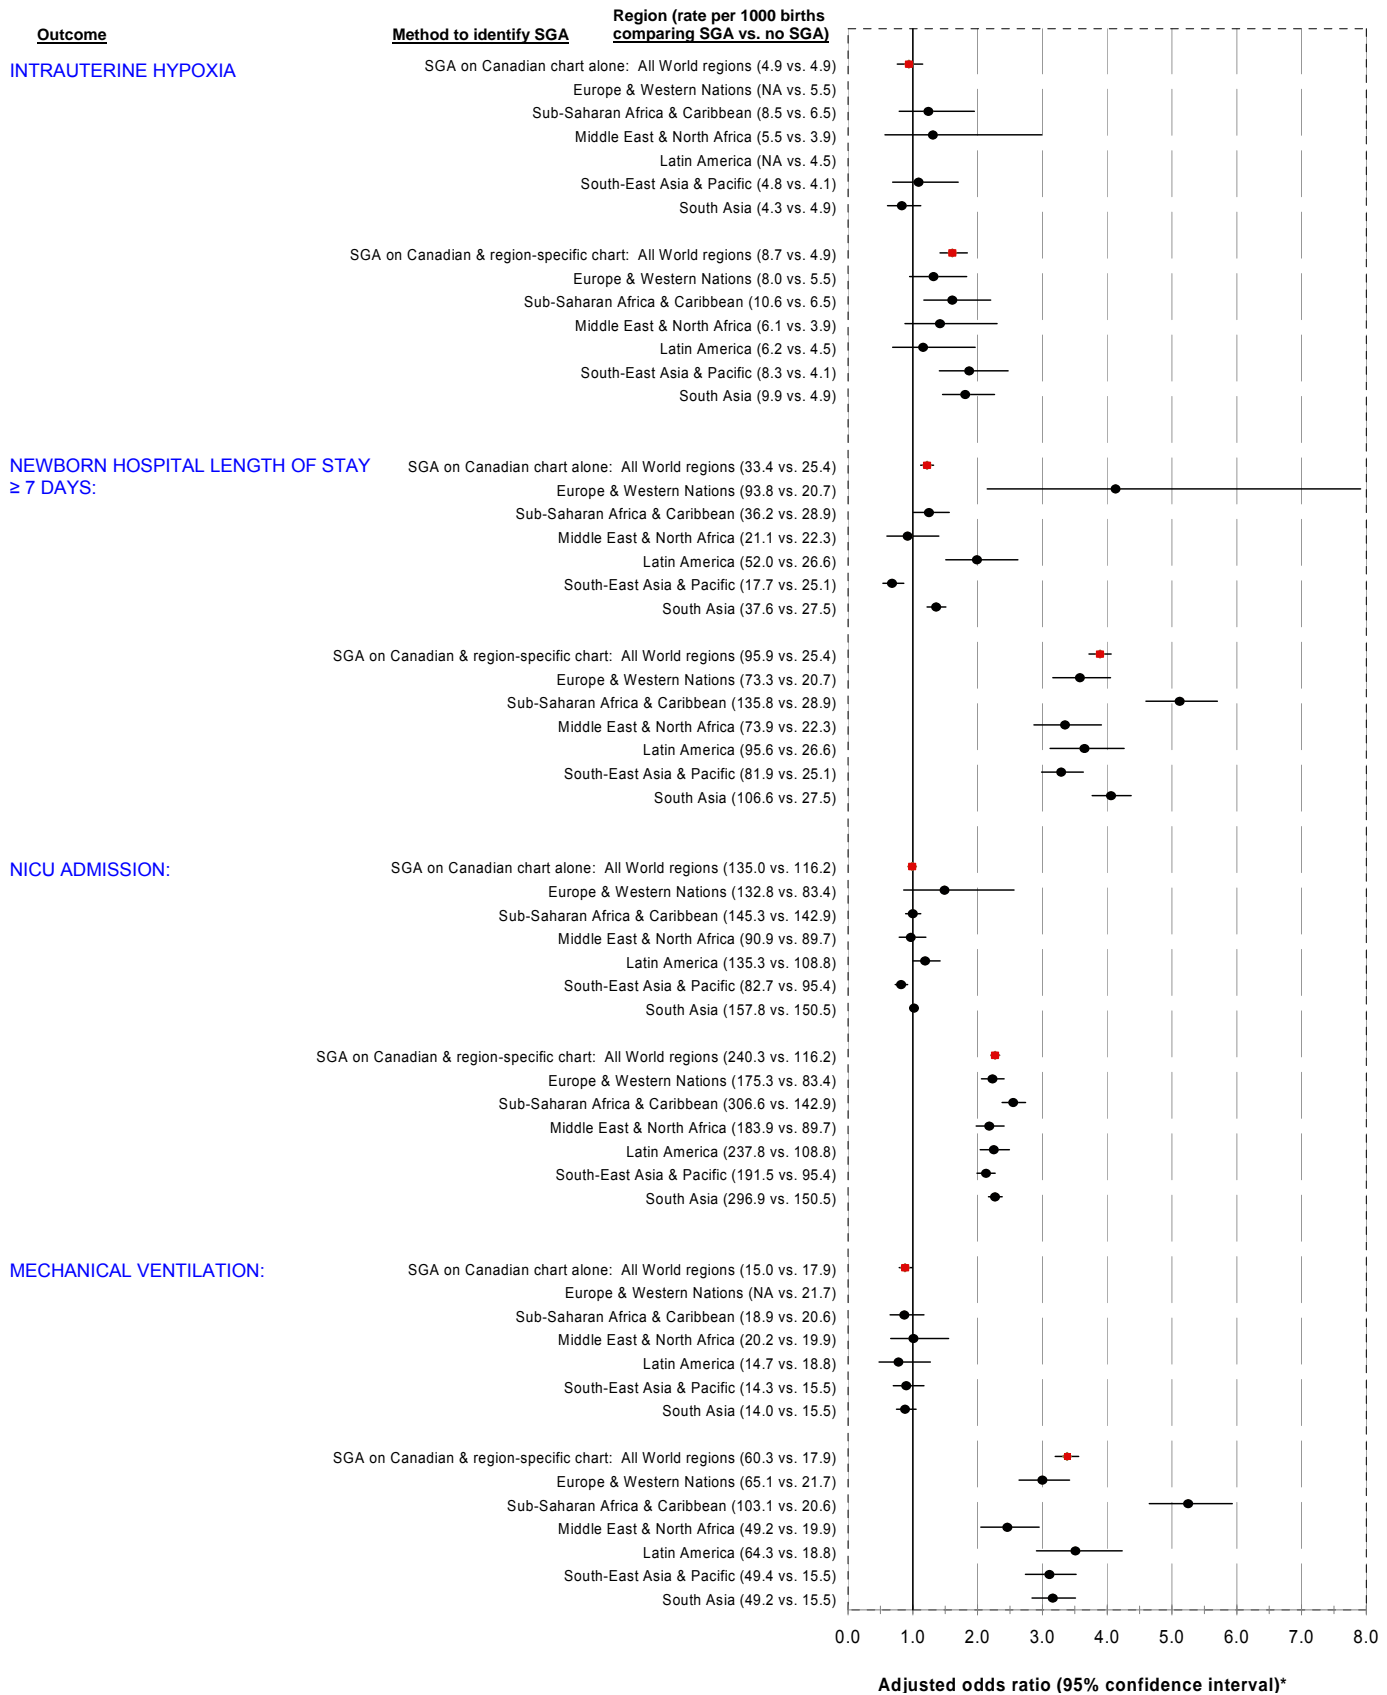

Note: NA = data suppression required because of low counts.  
\*Adjusted for maternal age, parity, year of delivery, maternal education, marital status, refugee status, knowledge of Canadian languages, duration of residence in Canada, world region of birth and neighborhood income quintile.
